# Supplementary material for: Undergraduate Medical Competencies in Digital Health and Curricular Module Development: Mixed Methods Study
Source: PubMed Central journal article supplement (PMC7661229; doi:10.2196/22161), 2020-10-29
Supplement: jmir_v22i10e22161_app2.pdf [file jmir_v22i10e22161_app2.pdf]

# Dozierendenbefragung zum Wahlpflichtmodul "Digital Health"

Sehr geehrte Dozierende,

bitte geben Sie uns Rückmeldung zu Ihrer Erfahrung mit unserem gemeinsamen Wahlpflichtmodul "Digital Health". Ihr Feedback wird uns bei der wissenschaftlichen Auswertung und Verbesserung der Lehre helfen. Die Ergebnisse werden anonymisiert im Rahmen unseres Projekts „IDHEC“ (Implementation of a Digital Health Elective Class at a German Medical School) veröffentlicht. Die Ethikkommission der Charité hat dieser Befragung zugestimmt (EA Nummer EA1/236/19).

Im Namen des gesamten Organisationsteams und der Studierenden bedanken wir uns noch einmal recht herzlich für Ihr Engagement und die Zusammenarbeit!

Daniel Glauert, Doktorand, Charité daniel-leon.glauert@charite.de

PD Dr. David Back, Studienleitung, BwKrhs Berlin, DSFZ Charité, david.back@charite.de

Dr. Akira-Sebastian Poncette, Prof. Dr. Dr. Felix Balzer, Studienkoordinatoren, Klinik für Anästhesiologie m.S. operative Intensivmedizin Charité

## Organisation des Wahlpflichtmoduls

|                                                                                | Stimme voll und ganz zu | Stimme zu             | Neutral               | Stimme nicht zu       | Stimme ganz und gar nicht zu |
|--------------------------------------------------------------------------------|-------------------------|-----------------------|-----------------------|-----------------------|------------------------------|
| 1) Ich war mit der Organisation des Moduls zufrieden.                          | <input type="radio"/>   | <input type="radio"/> | <input type="radio"/> | <input type="radio"/> | <input type="radio"/>        |
| 2) Ich war mit der Themenzusammenstellung des Moduls zufrieden.                | <input type="radio"/>   | <input type="radio"/> | <input type="radio"/> | <input type="radio"/> | <input type="radio"/>        |
| 3) Ich war mit dem Interesse und der Beteiligung der Studierenden zufrieden.   | <input type="radio"/>   | <input type="radio"/> | <input type="radio"/> | <input type="radio"/> | <input type="radio"/>        |
| 4) Ich war mit der Kommunikation mit dem Organisationsteam zufrieden.          | <input type="radio"/>   | <input type="radio"/> | <input type="radio"/> | <input type="radio"/> | <input type="radio"/>        |
| 5) Ich hatte genug Zeit zur Vermittlung der von mir geplanten Aspekte.         | <input type="radio"/>   | <input type="radio"/> | <input type="radio"/> | <input type="radio"/> | <input type="radio"/>        |
| 6) Freie Kommentare zu diesem Unterthema (Organisation des Wahlpflichtmoduls): |                         |                       |                       |                       |                              |

### Erfahrungen aus dem Wahlpflichtmodul

|                                                                                                                                                              | Stimme voll und ganz zu | Stimme zu             | Neutral               | Stimme nicht zu       | Stimme ganz und gar nicht zu |
|--------------------------------------------------------------------------------------------------------------------------------------------------------------|-------------------------|-----------------------|-----------------------|-----------------------|------------------------------|
| 7) Ich habe in diesem Rahmen erstmals zu Aspekten der digitalen Medizin gelehrt.                                                                             | <input type="radio"/>   | <input type="radio"/> | <input type="radio"/> | <input type="radio"/> | <input type="radio"/>        |
| 8) Ich konnte wichtige Erfahrungen für die Lehre von digitalen Medizininhalten sammeln.                                                                      | <input type="radio"/>   | <input type="radio"/> | <input type="radio"/> | <input type="radio"/> | <input type="radio"/>        |
| 9) Ich fühle mich bestärkt, in Zukunft mehr Lehre zu digitaler Medizin zu betreiben.                                                                         | <input type="radio"/>   | <input type="radio"/> | <input type="radio"/> | <input type="radio"/> | <input type="radio"/>        |
| 10) Ich würde noch mehr interdisziplinäre Lehrveranstaltungen für sinnvoll halten. (Falls Sie zustimmen, bitte erläutern Sie unten im Kommentarfeld.)        | <input type="radio"/>   | <input type="radio"/> | <input type="radio"/> | <input type="radio"/> | <input type="radio"/>        |
| 11) Ich wäre bereit, die in diesem Wahlpflichtmodul gelehrt Aspekte der digitalen Medizin auch im regulären Curriculum allen Medizinstudierenden anzubieten. | <input type="radio"/>   | <input type="radio"/> | <input type="radio"/> | <input type="radio"/> | <input type="radio"/>        |
| 12) Das Wahlpflichtmodul ist zur Erprobung neuer Lehrinhalte im Kontext von digitaler Medizin geeignet.                                                      | <input type="radio"/>   | <input type="radio"/> | <input type="radio"/> | <input type="radio"/> | <input type="radio"/>        |

13) Freie Kommentare zu diesem Unterthema (Erfahrungen aus dem Wahlpflichtmodul):

---

## Digitale Medizin im Medizinstudium

|                                                                                                                                                                                      | Stimme voll und ganz zu | Stimme zu             | Neutral               | Stimme nicht zu       | Stimme ganz und gar nicht zu |
|--------------------------------------------------------------------------------------------------------------------------------------------------------------------------------------|-------------------------|-----------------------|-----------------------|-----------------------|------------------------------|
| 14) Digitale Medizin wird den Berufsalltag von ÄrztInnen in den nächsten 5 Jahren stark beeinflussen.                                                                                | <input type="radio"/>   | <input type="radio"/> | <input type="radio"/> | <input type="radio"/> | <input type="radio"/>        |
| 15) Digitale Medizin ist im aktuellen Medizinstudium aus meiner bisherigen Erfahrung ausreichend und gut abgebildet.                                                                 | <input type="radio"/>   | <input type="radio"/> | <input type="radio"/> | <input type="radio"/> | <input type="radio"/>        |
| 16) Ich denke, den meisten MedizinstudentInnen ist digitale Medizin ein Begriff (mit den verschiedenen Aspekten, wie sie in diesem Modul vermittelt wurden).                         | <input type="radio"/>   | <input type="radio"/> | <input type="radio"/> | <input type="radio"/> | <input type="radio"/>        |
| 17) Ich halte es für den richtigen Ansatz, eher Kompetenzen als rein theoretisches Wissen zu vermitteln.                                                                             | <input type="radio"/>   | <input type="radio"/> | <input type="radio"/> | <input type="radio"/> | <input type="radio"/>        |
| 18) Angehende MedizinerInnen sollten schon während des Studiums umfassend und frühzeitig gezielt zu Aspekten der digitalen Gesundheit geschult werden, z.B. durch Module wie dieses. | <input type="radio"/>   | <input type="radio"/> | <input type="radio"/> | <input type="radio"/> | <input type="radio"/>        |
| 19) Lerninhalte digitaler Medizin sollten aus meiner Sicht auch im (Pflicht)Curriculum des Modellstudiengangs abgebildet werden.                                                     | <input type="radio"/>   | <input type="radio"/> | <input type="radio"/> | <input type="radio"/> | <input type="radio"/>        |

20) Freie Kommentare zu diesem Unterthema (Digitale Medizin als Bestandteil des Medizinstudiums):

---

---

Bitte teilen Sie uns noch kurz und prägnant ihre Gedanken zu folgenden Themen mit (gerne auch in Schlagworten):

---

- 21) In welcher Weise wird sich die Digitalisierung auf den Berufsalltag von Ärztinnen und Ärzten auswirken und wo sehen Sie die größten Herausforderungen? \_\_\_\_\_
- 
- 22) Welche Inhalte und Kompetenzen der digitalen Medizin würden Sie empfehlen, an der Charité zu unterrichten? \_\_\_\_\_
- 
- 23) Welche Lehrformate (z.B. Seminare, Workshops) halten Sie zur Lehre digitaler Medizin für am geeignetsten? \_\_\_\_\_
- 
- 24) Optional können Sie hier noch Ihre Email-Adresse angeben, sollten Sie einer Kontaktaufnahme zu Ihrem Feedback zustimmen. \_\_\_\_\_

# Studierendenbefragung zum Wahlpflichtmodul „Digital Health“

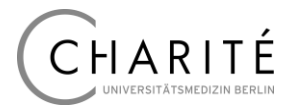

(Kontakt: Daniel Glauert, Doktorand, [daniel-leon.glauert@charite.de](mailto:daniel-leon.glauert@charite.de); PD Dr. Back, BwKrhs Berlin, DSFZ Charité, [david.back@charite.de](mailto:david.back@charite.de))

Sehr geehrte Studierende,

Bitte geben sie uns Rückmeldung zu Ihrer Erfahrung mit unserem gemeinsamen **Wahlpflichtmodul "Digital Health"**. Ihr Feedback wird uns bei der wissenschaftlichen Auswertung und Verbesserung des Lehrangebots helfen. Die Ergebnisse werden **anonymisiert** im Rahmen unseres Projekts „IDHEC“ (Implementation of a Digital Health Elective Class at a German Medical School) veröffentlicht.

Im Namen des gesamten Organisationsteams bedanken wir uns noch einmal sehr herzlich für Ihr Engagement und die gute Zusammenarbeit!

| Organisation des Wahlpflichtmoduls |                                                                                                                             | stimme voll und ganz zu  | Stimme zu                | neutral                  | Stimme nicht zu          | Stimme ganz und gar nicht zu |
|------------------------------------|-----------------------------------------------------------------------------------------------------------------------------|--------------------------|--------------------------|--------------------------|--------------------------|------------------------------|
| 1.                                 | Ich war mit der Organisation des Moduls zufrieden.                                                                          | <input type="checkbox"/> | <input type="checkbox"/> | <input type="checkbox"/> | <input type="checkbox"/> | <input type="checkbox"/>     |
| 2.                                 | Ich war mit der Themenzusammenstellung des Moduls zufrieden.                                                                | <input type="checkbox"/> | <input type="checkbox"/> | <input type="checkbox"/> | <input type="checkbox"/> | <input type="checkbox"/>     |
| 3.                                 | Ich war mit dem Engagement der Dozierenden zufrieden.                                                                       | <input type="checkbox"/> | <input type="checkbox"/> | <input type="checkbox"/> | <input type="checkbox"/> | <input type="checkbox"/>     |
| 4.                                 | Ich war mit der Kommunikation mit dem Organisationsteam zufrieden.                                                          | <input type="checkbox"/> | <input type="checkbox"/> | <input type="checkbox"/> | <input type="checkbox"/> | <input type="checkbox"/>     |
| 5.                                 | Ich bin mit meinem Wissenszuwachs durch das Wahlpflichtmodul zufrieden (soweit zutreffend: auch Fähigkeiten / Kompetenzen). | <input type="checkbox"/> | <input type="checkbox"/> | <input type="checkbox"/> | <input type="checkbox"/> | <input type="checkbox"/>     |
| 6.                                 | Ich würde das Wahlpflichtmodul meinen KommilitonInnen empfehlen.                                                            | <input type="checkbox"/> | <input type="checkbox"/> | <input type="checkbox"/> | <input type="checkbox"/> | <input type="checkbox"/>     |
| 7.                                 | Insgesamt bin ich mit dem Wahlpflichtmodul zufrieden.                                                                       | <input type="checkbox"/> | <input type="checkbox"/> | <input type="checkbox"/> | <input type="checkbox"/> | <input type="checkbox"/>     |

Freie Kommentarmöglichkeit:

| Erfahrungen aus dem Wahlpflichtmodul |                                                                                                                                                                         | stimme voll und ganz zu  | Stimme zu                | neutral                  | Stimme nicht zu          | Stimme ganz und gar nicht zu |
|--------------------------------------|-------------------------------------------------------------------------------------------------------------------------------------------------------------------------|--------------------------|--------------------------|--------------------------|--------------------------|------------------------------|
| 8.                                   | Ich habe in diesem Rahmen erstmals im Studium Aspekte der digitalen Medizin gezielt vermittelt bekommen (wenn nein, bitte erläutern Sie dies im Kommentarfeld unten).   | <input type="checkbox"/> | <input type="checkbox"/> | <input type="checkbox"/> | <input type="checkbox"/> | <input type="checkbox"/>     |
| 9.                                   | Ich fühle mich durch das Wahlpflichtmodul besser auf meinen zukünftigen Berufsalltag vorbereitet (v.a. auf potentielle digitale Aspekte).                               | <input type="checkbox"/> | <input type="checkbox"/> | <input type="checkbox"/> | <input type="checkbox"/> | <input type="checkbox"/>     |
| 10.                                  | Ich fühle mich durch das Modul bestärkt, mich in Zukunft weiter mit Aspekten digitaler Medizin zu beschäftigen                                                          | <input type="checkbox"/> | <input type="checkbox"/> | <input type="checkbox"/> | <input type="checkbox"/> | <input type="checkbox"/>     |
| 11.                                  | Ich würde noch mehr interdisziplinäre Lehrveranstaltungen in diesem Modul für sinnvoll halten (wenn ja, bitte erläutern Sie dies bitte konkret unten im Kommentarfeld). | <input type="checkbox"/> | <input type="checkbox"/> | <input type="checkbox"/> | <input type="checkbox"/> | <input type="checkbox"/>     |
| 12.                                  | Die gewählten Lehrformate haben das Lernen unterstützt.                                                                                                                 | <input type="checkbox"/> | <input type="checkbox"/> | <input type="checkbox"/> | <input type="checkbox"/> | <input type="checkbox"/>     |
| 13.                                  | Ich habe im Wahlpflichtmodul Aspekte meiner zukünftigen Arztrolle kennengelernt, die mir vorher nicht bewusst waren (Erfindergeist, Ethik, Recht, Ökonomie...)          | <input type="checkbox"/> | <input type="checkbox"/> | <input type="checkbox"/> | <input type="checkbox"/> | <input type="checkbox"/>     |

Freie Kommentarmöglichkeit:

| Digitale Medizin im Medizinstudium                                                                                                                                         | stimme voll und ganz zu  | Stimme zu                | neutral                  | Stimme nicht zu          | Stimme ganz und gar nicht zu |
|----------------------------------------------------------------------------------------------------------------------------------------------------------------------------|--------------------------|--------------------------|--------------------------|--------------------------|------------------------------|
| 14. Digitale Medizin wird den Berufsalltag von ÄrztInnen in den nächsten 5 Jahren stark beeinflussen.                                                                      | <input type="checkbox"/> | <input type="checkbox"/> | <input type="checkbox"/> | <input type="checkbox"/> | <input type="checkbox"/>     |
| 15. Digitale Medizin ist im aktuellen Medizinstudium aus meiner bisherigen Erfahrung ausreichend und gut abgebildet.                                                       | <input type="checkbox"/> | <input type="checkbox"/> | <input type="checkbox"/> | <input type="checkbox"/> | <input type="checkbox"/>     |
| 16. Ich denke, den meisten meiner KommilitonInnen ist digitale Medizin ein Begriff (mit den verschiedenen Aspekten, wie sie in diesem Modul vermittelt wurden).            | <input type="checkbox"/> | <input type="checkbox"/> | <input type="checkbox"/> | <input type="checkbox"/> | <input type="checkbox"/>     |
| 17. Ich halte es für den richtigen Ansatz, eher Kompetenzen als rein theoretisches Wissen zu vermitteln.                                                                   | <input type="checkbox"/> | <input type="checkbox"/> | <input type="checkbox"/> | <input type="checkbox"/> | <input type="checkbox"/>     |
| 18. Angehende MedizinerInnen sollten schon während des Studiums frühzeitig und gezielt zu Aspekten der digitalen Gesundheit geschult werden, z.B. durch Module wie dieses. | <input type="checkbox"/> | <input type="checkbox"/> | <input type="checkbox"/> | <input type="checkbox"/> | <input type="checkbox"/>     |
| 19. Lerninhalte digitaler Medizin sollten aus meiner Sicht auch im (Pflicht)Curriculum des Modellstudiengangs abgebildet werden.                                           | <input type="checkbox"/> | <input type="checkbox"/> | <input type="checkbox"/> | <input type="checkbox"/> | <input type="checkbox"/>     |

Freie Kommentarmöglichkeit:

---



---

**Bitte teilen Sie uns noch kurz und prägnant ihre Gedanken zu folgenden Themen mit (gerne auch in Schlagwörtern):**

20. In welcher Weise wird sich die Digitalisierung auf den Berufsalltag von ÄrztInnen auswirken und wo sehen Sie die größten Herausforderungen?

---



---



---



---

21. Das hat mir besonders an diesem Modul gefallen (Fächer, Inhalte, Abläufe etc.):

---



---



---

22. Das halte ich bei diesem Modul noch für verbesserungswürdig (Fächer, Inhalte, Abläufe etc.):

---



---



---

**VIELEN DANK FÜR IHRE TEILNAHME!**
