# Supplementary material for: Undergraduate Medical Competencies in Digital Health and Curricular Module Development: Mixed Methods Study
Source: PubMed Central journal article supplement (PMC7661229; doi:10.2196/22161), 2020-10-29

### Digital Health at Medical Schools - Lecturers

■ Strongly Disagree 
 ■ Disagree 
 ■ Undecided 
 ■ Agree 
 ■ Strongly Agree

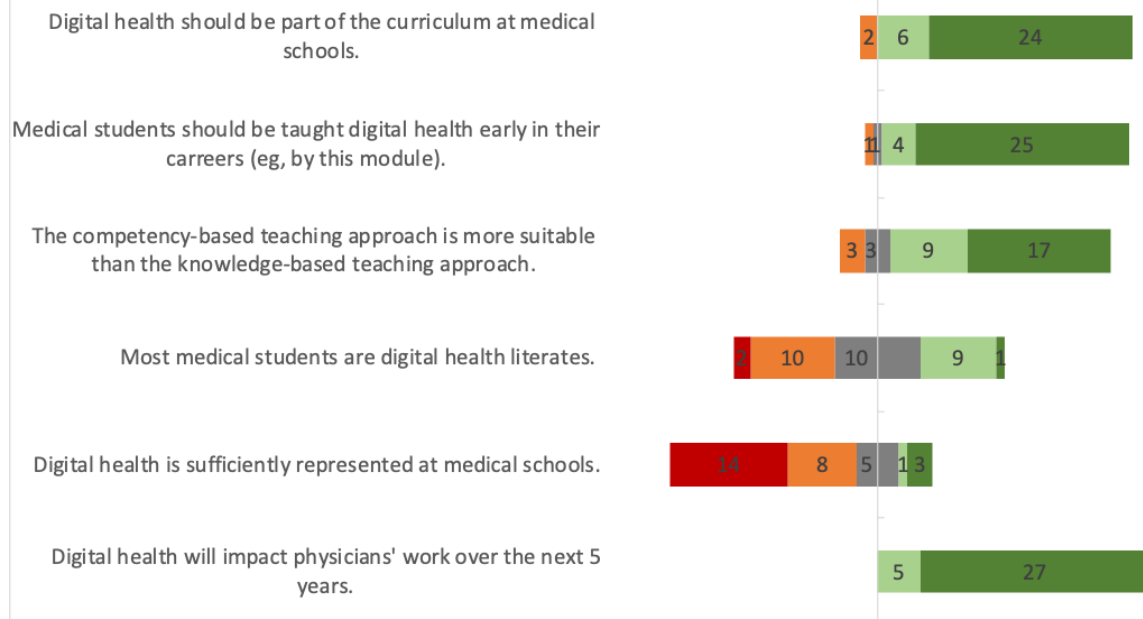

### Digital Health at Medical Schools - Students

■ Strongly Disagree 
 ■ Disagree 
 ■ Undecided 
 ■ Agree 
 ■ Strongly Agree

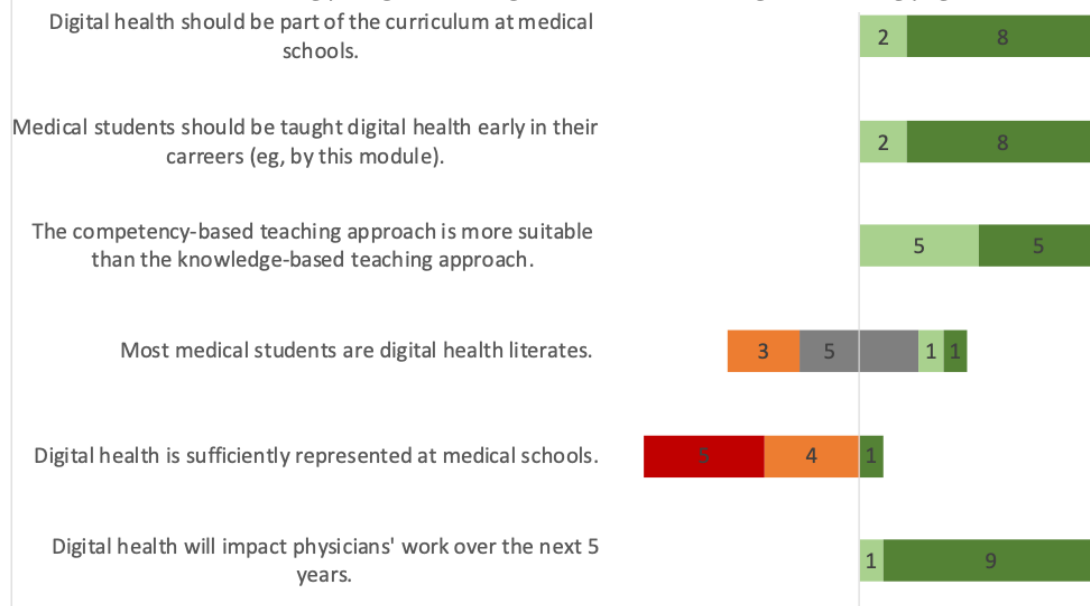

### Experiences from this Module - Lecturers

■ Strongly Disagree 
 ■ Disagree 
 ■ Undecided 
 ■ Agree 
 ■ Strongly Agree

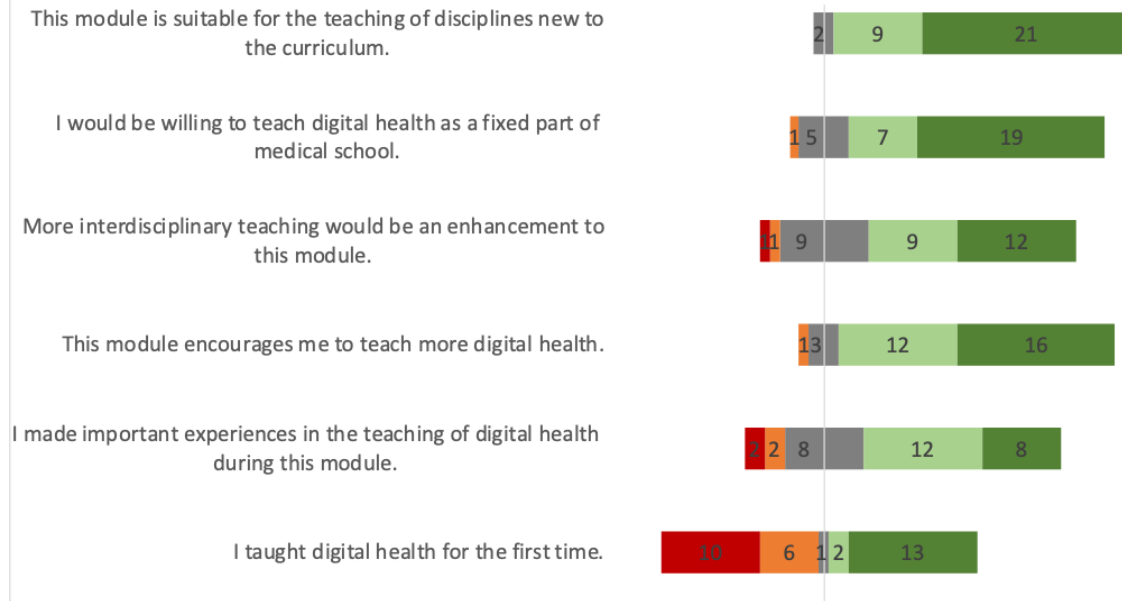

### Experiences from this Module - Students

■ Strongly Disagree 
 ■ Disagree 
 ■ Undecided 
 ■ Agree 
 ■ Strongly Agree

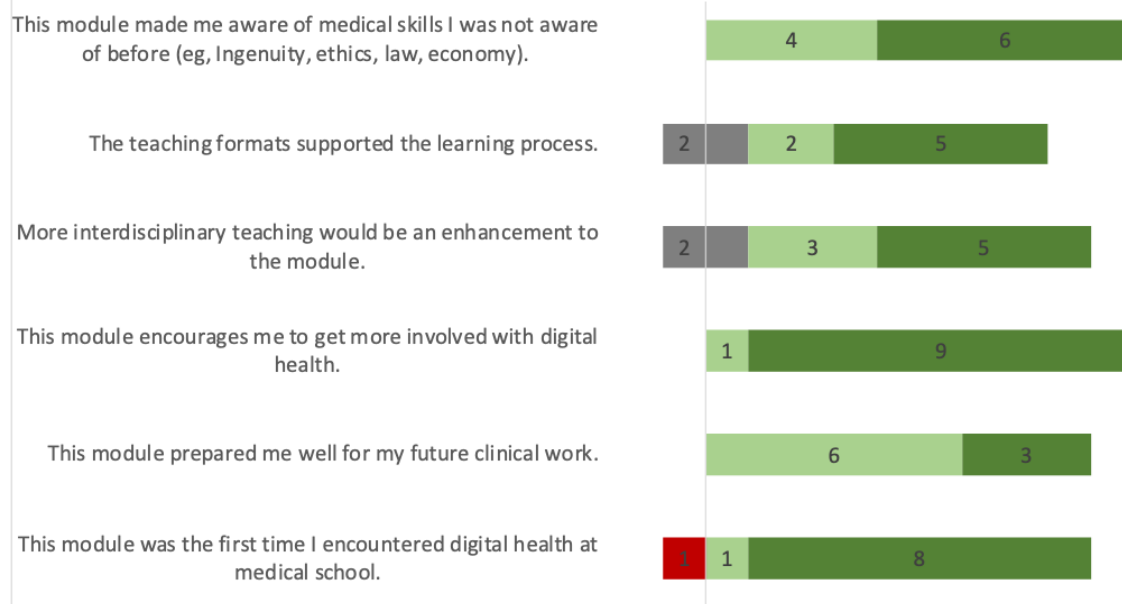

### Feedback on Module Organization - Lecturers

■ Strongly Disagree 
 ■ Disagree 
 ■ Undecided 
 ■ Agree 
 ■ Strongly Agree

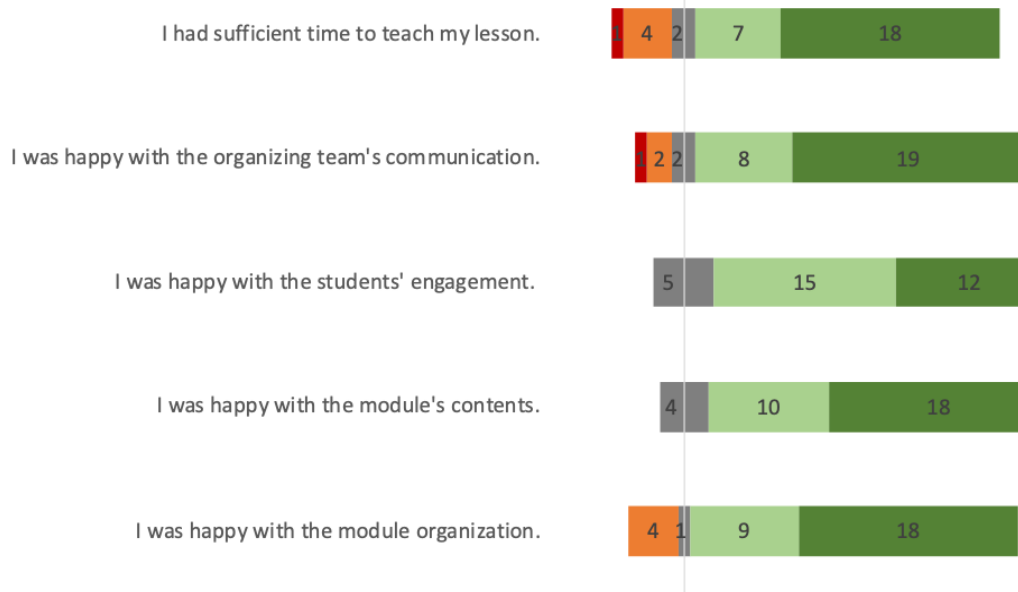

### Feedback on Module Organization - Students

■ Strongly Disagree 
 ■ Disagree 
 ■ Undecided 
 ■ Agree 
 ■ Strongly Agree

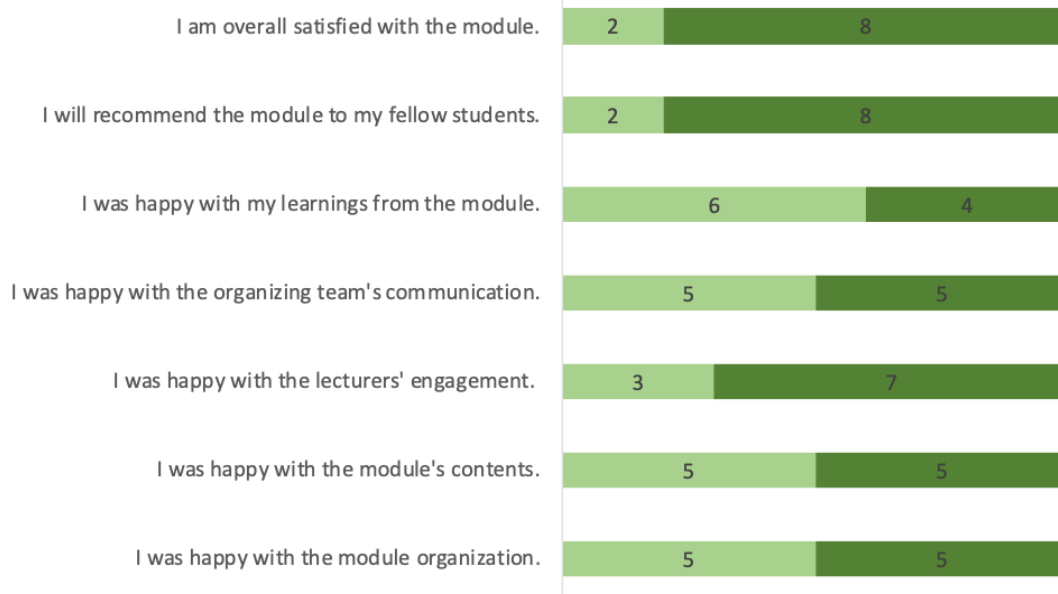

Supplement: jmir_v22i10e22161_app3.pdf [file jmir_v22i10e22161_app3.pdf]
